# Supplementary material
Source: PubMed Central journal article supplement (PMC8105555)
Supplement: mmc1.pdf [file mmc1.pdf]

**Caption of Supplementary material**

1. Table S1. Primer pair sequences used in the qRT-PCR analysis
2. Figure S1. Gating strategy for flow cytometry analysis.
3. Figure S2 IL-6 TNF $\alpha$  and IFN $\gamma$  protein detection in plasma samples.
4. Table S2. Median values, interquartile range, and Mann–Whitney U test of cytokine expression (proteins) in plasma samples of COVID-19 patients and HDs
5. Figure S3. CD3+HERV W ENV + cells in HD after spike and IL6 stimulation
6. Table S3 Bonferroni multiple comparison in *in vitro* stimulation with Spike and IL6
7. Figure S4 IL6 expression after ENV STIMULATION in Healthy donors
8. Figure S5. HERV-W ENV and cytokine mRNA expression in COVID-19 patients according to clinical status
9. Table S4. Mann–Whitney U test of HERV-W ENV, cytokine and receptor expressions (mRNA) in blood samples of COVID-19 patients and HDs according to clinical status.
10. Table S5. Median values, interquartile range and Kruskal-Wallis test of HERV-W ENV, cytokines and receptors expression (mRNA) in blood samples of COVID19 and HD according to clinical status.
11. Table S6 Median values and interquartile range of HERV-W ENV percentage in Lymphocytes according to Pulmonary involvement.
12. Figure S6 Biochemical inflammatory marker levels and cytokine mRNA expression in COVID-19 patients according to respiratory outcome.
13. Table S7. Median values and interquartile range of HERV-W env transcriptional activity and cytokines and receptors expression (mRNA) in blood samples from COVID19, respect to respiratory outcome
14. Table S8. Median values and interquartile range of biochemical markers in blood samples from COVID19, respect to respiratory outcome
15. Table S9. Median values and interquartile range of the percentage of leucocytes and different subpopulations of leukocytes in blood samples from COVID19, respect to respiratory outcome

**TABLE S1 Primer pairs sequences used in the qRT Real time PCR analysis**

| GENE          |                | FORWARD PRIMER (5'→3') | REVERSE PRIMER (5'→3')   |
|---------------|----------------|------------------------|--------------------------|
| *++HERV W ENV | AF331500       | GTATGTCTGATGGGGGTGGAG  | CTAGTCCTTTGTAGGGGCTAGAG  |
| #GUSB         | NM_000181      | CAGTTCCTCCAGCTTCAATG   | ACCCAGCCGACAAAATGC       |
| #IL-6         | NM_000600.3    | TGCAATAACCACCCCTGACC   | ATTTGCCGAAGAGCCCTCAG     |
| #IL-10        | NM_000572.2    | ACATCAAGGCGCATGTGAAC   | CACGGCCTTGCTCTTGTGTTT    |
| °IL-17        | U32659.1       | CGGACTGTGATGGTCAACCTGA | GCACTTTGCCTCCAGATCACA    |
| §IL-17RA      | NM_001289905.1 | TCATCGTCTGCATGACCTGGAG | GGCTGAGTAGATGATCCAGACC   |
| #TNF $\alpha$ | NM_000594.3    | CCCGAGTGACAAGCCTGTAG   | TGAGGTACAGGCCCTCTGAT     |
| #INF $\gamma$ | NM_000619.2    | TCAGCTCTGCATCGTTTTGG   | GTTCCATTATCCGCTACATCTGAA |
| §MCP1         | NM_002982.4    | AGAATCACCAGCAGCAAGTGTC | TCCTGAACCCACTTCTGCTGG    |
| §CXCR1        | NM_000634.3    | TCCTTTTCCGCCAGGCTTACCA | GGCACGATGAAGCCAAAGGTGT   |
| §CXCL6        | NM_002993.4    | GGGAAGCAAGTTTGTCTGGACC | AAACTGCTCCGCTGAAGACTGG   |

\*Levet S, Medina J, Joanou J, Demolder A, Queruel N, Réant K, Normand M, Seffals M, Dimier J, Germi R, Piofczyk T, Portoukalian J, Touraine JL, Perron H. An ancestral retroviral protein identified as a therapeutic target in type-1 diabetes. *JCI Insight*. 2017;2:e94387. doi: 10.1172/jci.insight.94387.

++Charvet et al. Human Endogenous Retrovirus Type W Envelope from Multiple Sclerosis Demyelinating Lesions Shows Unique Solubility and Antigenic Characteristics *Virologica Sinica*, 2021. DOI 10.1007/s12250-021-00372-0

#Balestrieri E, Cipriani C, Matteucci C, et al. Children With Autism Spectrum Disorder and Their Mothers Share Abnormal Expression of Selected Endogenous Retroviruses Families and Cytokines. *Front Immunol*. 2019;10:2244. Published 2019 Sep 26. doi:10.3389/fimmu.2019.02244

° Deng J, Fan C, Gao X, Zeng Q, Guo R, Wei Y, Chen Z, Chen Y, Gong D, Feng J, Xia Y, Xiang S, Gong S, Yuan L, Shen W, Shen W, Lin L, Jiang T, He D, Lu L, Chen X, Yu D. Corrigendum: Signal Transducer and Activator of Transcription 3 Hyperactivation Associates With Follicular Helper T Cell Differentiation and Disease Activity in Rheumatoid Arthritis. *Front Immunol*. 2019 Aug 22;10:2008. doi: 10.3389/fimmu.2019.02008.

§ Matteucci C, Minutolo A, Balestrieri E, Petrone V, Fanelli M<sup>1</sup>, Malagnino V, Ianetta M, Giovinazzo A, Miele MT, di Francesco P, Mastino A, Sinibaldi Vallebona P, Bernardini S, Rogliani P, Sarmati L, Andreoni M, Grelli and Garaci. Thymosin alpha 1 mitigates cytokine storm in blood cells from COVID-19 patients. *Open Forum Infectious Disease* 2020. DOI: 10.1093/ofid/ofaa588

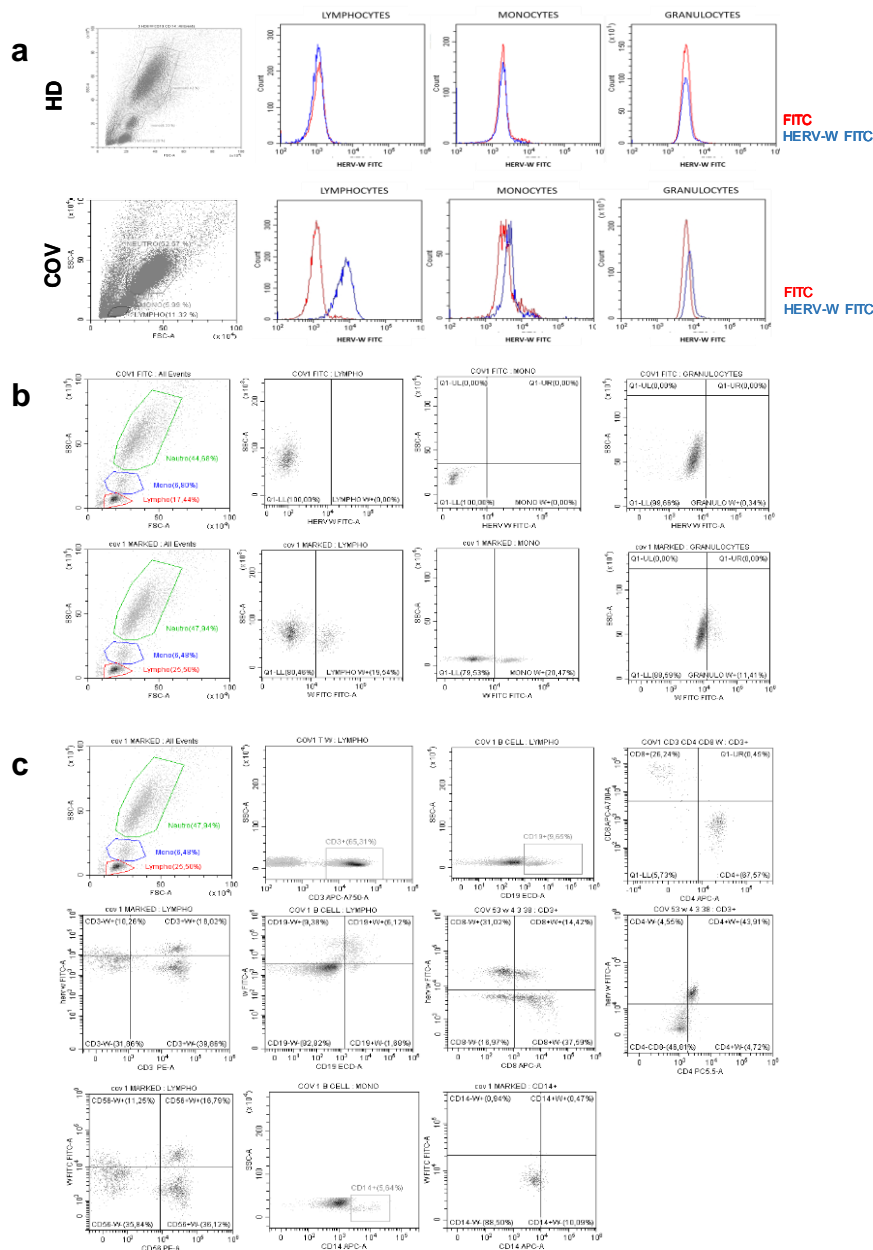

**Figure S1. Gating strategy for flow cytometry analysis.** (a) FSC vs SSC dot plots of a representative healthy donor (HD, upper panels) and a COVID-19 patient (COV, lower panels), analysis of the mean intensity of HERV W ENV fluorescence in lymphocytes, monocytes, and granulocytes. HD were used as controls for the expression of HERV-W ENV (b), Analysis of HERV-W ENV-positive cells (%) in a representative COV patient: cells stained only with FITC-labelled secondary antibody (upper panels), cells marked with anti HERV-W ENV antibody and FITC-labelled secondary antibody (lower panels). (c) Analysis of positive HERV-W ENV cells (%) in T cells (CD3+/CD4+, CD3+/CD8+), B cells (CD19+), Natural Killer cells (CD3-CD56+), and monocytes (CD14+). The analysis was done by acquiring at least 450000 events in the Leukocyte gate.

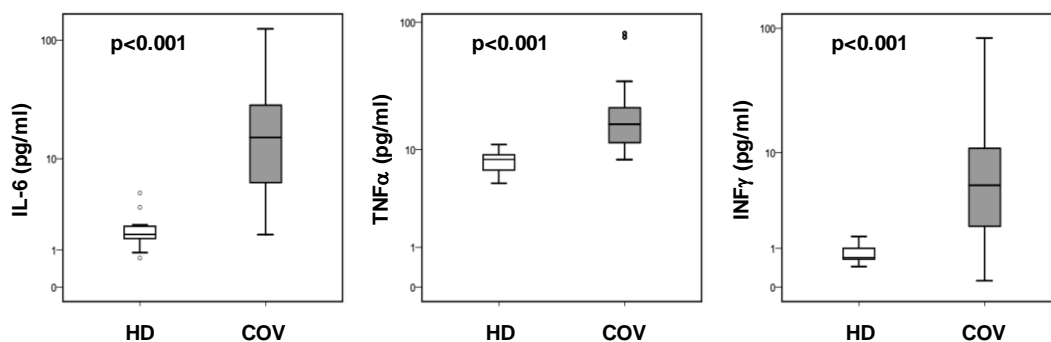

**Figure S2. Cytokine levels (protein) in plasma samples of COVID-19 patients and Healthy Donors.**  
 The concentration of cytokines (pg/ml) including IL-6, TNF $\alpha$ , and INF $\gamma$  has been evaluated in plasma samples of COVID-19 patients and healthy donors by ELISA analysis, and results are represented as box plots. Non-parametric Mann–Whitney test was used to compare groups and statistically significant values were considered when  $p < 0.050$ .

**Table S2. Median values, interquartile range, and Mann–Whitney U test of cytokine expression (proteins) in plasma samples of COVID-19 patients and HDs.**

|                                            | IL-6       | TNF $\alpha$ | INF $\gamma$ |
|--------------------------------------------|------------|--------------|--------------|
| <b>COVID-19 PATIENTS Number</b>            | 29         | 29           | 29           |
| Median                                     | 15.400     | 16.100       | 5.150        |
| Percentiles                                |            |              |              |
| 25                                         | 5.500      | 11.350       | 1.945        |
| 50                                         | 15.400     | 16.100       | 5.150        |
| 75                                         | 29.200     | 21.850       | 11.150       |
| <b>HEALTHY DONORS Number</b>               | 17         | 17           | 17           |
| Median                                     | 1.680      | 8.260        | 0.694        |
| Interquartile Range (IQR)                  |            |              |              |
| 25                                         | 1.470      | 6.580        | 0.625        |
| 50                                         | 1.680      | 8.260        | 0.694        |
| 75                                         | 2.145      | 9.259        | 1.025        |
| <b>Healthy donors vs COVID-19 patients</b> | * $<0.001$ | $<0.001$     | $<0.001$     |

\*Mann–Witney U Test

a)

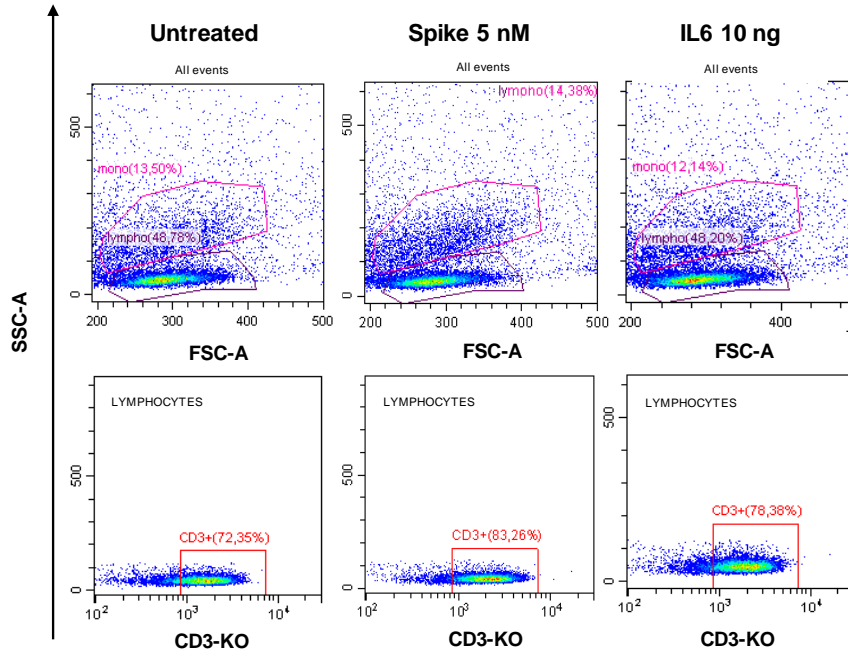

b)

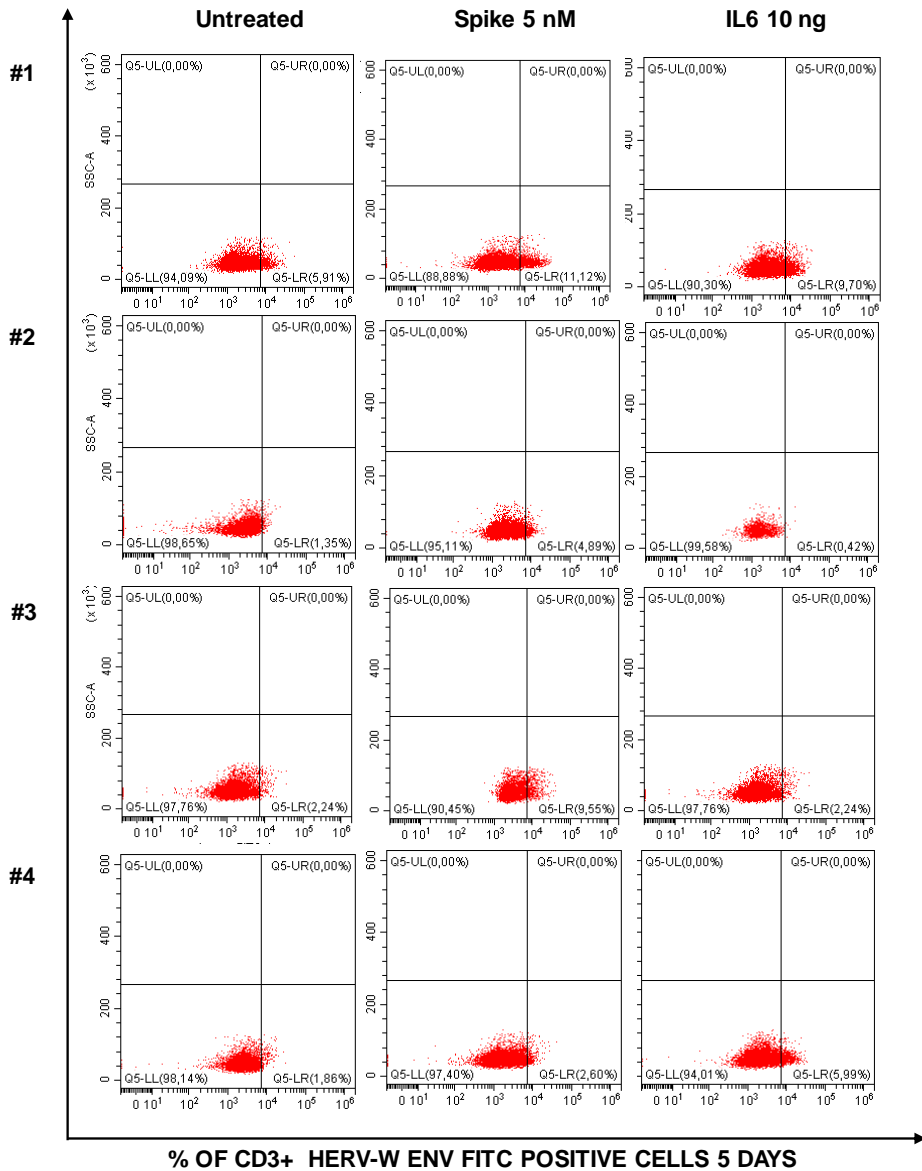

**Figure S3. Gating strategy for flow cytometry analysis of Healthy Donors expose to SARS-CoV2 Spike and IL6 proteins.** (a) FSC vs SSC dot plots of a representative healthy donor (HD, upper panels) in untreated (left panel) or treated with SPIKE (5 nM, central panel) or IL6 (10ng/ml, right panel); in the lower panel CD3-KO vs SSC dot plots gated of Lymphocytes. (b) Analysis of HERV-W ENV-positive cells (%) in CD3+ cells of 4 Healthy Donors after 5 days of exposure.

**Table S3** Bonferroni's multiple comparison \*p≤0.05 of HERVW-ENV and IL-6 expression in HDs stimulated with SARS-CoV2 Spike protein and IL-6 protein for 3,24 hours and 5 days.

| Variabile dipendente |        |        | Mean of Difference | std. error | Sign.       | Confidence 95% |          |
|----------------------|--------|--------|--------------------|------------|-------------|----------------|----------|
|                      |        |        |                    |            |             | low            | up       |
| HERVW ENV 3h         | CTR    | IL6    | -1,86971           | 9,25801    | 1,000       | -28,1526       | 24,4132  |
|                      |        | SPIKE1 | -40,85878*         | 9,25801    | <b>,001</b> | -67,1417       | -14,5759 |
|                      |        | SPIKE5 | -26,20205          | 9,25801    | ,051        | -52,4849       | ,0808    |
|                      | IL6    | CTR    | 1,86971            | 9,25801    | 1,000       | -24,4132       | 28,1526  |
|                      |        | SPIKE1 | -38,98907*         | 9,25801    | <b>,001</b> | -65,2719       | -12,7062 |
|                      |        | SPIKE5 | -24,33234          | 9,25801    | ,083        | -50,6152       | 1,9505   |
|                      | SPIKE1 | CTR    | 40,85878*          | 9,25801    | <b>,001</b> | 14,5759        | 67,1417  |
|                      |        | IL6    | 38,98907*          | 9,25801    | <b>,001</b> | 12,7062        | 65,2719  |
|                      |        | SPIKE5 | 14,65673           | 9,25801    | ,748        | -11,6261       | 40,9396  |
|                      | SPIKE5 | CTR    | 26,20205           | 9,25801    | ,051        | -,0808         | 52,4849  |
|                      |        | IL6    | 24,33234           | 9,25801    | ,083        | -1,9505        | 50,6152  |
|                      |        | SPIKE1 | -14,65673          | 9,25801    | ,748        | -40,9396       | 11,6261  |
| HERV W ENV 24h       | CTR    | IL6    | -4,80439           | 30,13272   | 1,000       | -90,3492       | 80,7404  |
|                      |        | SPIKE1 | -48,50968          | 30,13272   | ,712        | -134,0545      | 37,0351  |
|                      |        | SPIKE5 | -110,39406*        | 30,13272   | ,006        | -195,9388      | -24,8493 |
|                      | IL6    | CTR    | 4,80439            | 30,13272   | 1,000       | -80,7404       | 90,3492  |
|                      |        | SPIKE1 | -43,70529          | 30,13272   | ,948        | -129,2501      | 41,8395  |
|                      |        | SPIKE5 | -105,58967*        | 30,13272   | ,009        | -191,1344      | -20,0449 |
|                      | SPIKE1 | CTR    | 48,50968           | 30,13272   | ,712        | -37,0351       | 134,0545 |
|                      |        | IL6    | 43,70529           | 30,13272   | <b>,948</b> | -41,8395       | 129,2501 |
|                      |        | SPIKE5 | -61,88438          | 30,13272   | ,297        | -147,4292      | 23,6604  |
|                      | SPIKE5 | CTR    | 110,39406*         | 30,13272   | ,006        | 24,8493        | 195,9388 |
|                      |        | IL6    | 105,58967*         | 30,13272   | <b>,009</b> | 20,0449        | 191,1344 |
|                      |        | SPIKE1 | 61,88438           | 30,13272   | ,297        | -23,6604       | 147,4292 |
| HERV W ENV 5DAYS     | CTR    | IL6    | -17,39140          | 14,46794   | 1,000       | -58,4649       | 23,6821  |
|                      |        | SPIKE1 | -55,62558*         | 14,46794   | <b>,004</b> | -96,6991       | -14,5521 |
|                      |        | SPIKE5 | -36,33136          | 14,46794   | ,108        | -77,4049       | 4,7421   |
|                      | IL6    | CTR    | 17,39140           | 14,46794   | 1,000       | -23,6821       | 58,4649  |
|                      |        | SPIKE1 | -38,23418          | 14,46794   | ,080        | -79,3077       | 2,8393   |
|                      |        | SPIKE5 | -18,93996          | 14,46794   | 1,000       | -60,0135       | 22,1335  |
|                      | SPIKE1 | CTR    | 55,62558*          | 14,46794   | <b>,004</b> | 14,5521        | 96,6991  |
|                      |        | IL6    | 38,23418           | 14,46794   | ,080        | -2,8393        | 79,3077  |
|                      |        | SPIKE5 | 19,29422           | 14,46794   | 1,000       | -21,7793       | 60,3677  |
|                      | SPIKE5 | CTR    | 36,33136           | 14,46794   | ,108        | -4,7421        | 77,4049  |
|                      |        | IL6    | 18,93996           | 14,46794   | 1,000       | -22,1335       | 60,0135  |
|                      |        | SPIKE1 | -19,29422          | 14,46794   | 1,000       | -60,3677       | 21,7793  |

**Table S3 continued**

| Independent |     |        | Mean of Difference | std. error | Sign. | Confidence 95% |        |
|-------------|-----|--------|--------------------|------------|-------|----------------|--------|
|             |     |        |                    |            |       | low            | up     |
| IL6_3h      | CTR | IL6    | 1,02678            | ,76073     | 1,000 | -1,1329        | 3,1864 |
|             |     | SPIKE1 | ,83211             | ,76073     | 1,000 | -1,3275        | 2,9918 |
|             |     | SPIKE5 | -1,45729           | ,76073     | ,394  | -3,6169        | ,7024  |

|                                          |        |        |             |           |             |            |           |
|------------------------------------------|--------|--------|-------------|-----------|-------------|------------|-----------|
|                                          | IL6    | CTR    | -1,02678    | ,76073    | 1,000       | -3,1864    | 1,1329    |
|                                          |        | SPIKE1 | -,19466     | ,76073    | 1,000       | -2,3543    | 1,9650    |
|                                          |        | SPIKE5 | -2,48406*   | ,76073    | ,017        | -4,6437    | -,3244    |
|                                          | SPIKE1 | CTR    | -,83211     | ,76073    | 1,000       | -2,9918    | 1,3275    |
|                                          |        | IL6    | ,19466      | ,76073    | 1,000       | -1,9650    | 2,3543    |
|                                          |        | SPIKE5 | -2,28940*   | ,76073    | <b>,033</b> | -4,4490    | -,1297    |
|                                          | SPIKE5 | CTR    | 1,45729     | ,76073    | ,394        | -,7024     | 3,6169    |
|                                          |        | IL6    | 2,48406*    | ,76073    | <b>,017</b> | ,3244      | 4,6437    |
|                                          |        | SPIKE1 | 2,28940*    | ,76073    | ,033        | ,1297      | 4,4490    |
| IL6_24h                                  | CTR    | IL6    | ,09539      | 108,13983 | 1,000       | -306,9063  | 307,0971  |
|                                          |        | SPIKE1 | -172,88139  | 108,13983 | ,727        | -479,8831  | 134,1203  |
|                                          |        | SPIKE5 | -323,52919* | 108,13983 | <b>,034</b> | -630,5309  | -16,5275  |
|                                          | IL6    | CTR    | -,09539     | 108,13983 | 1,000       | -307,0971  | 306,9063  |
|                                          |        | SPIKE1 | -172,97678  | 108,13983 | ,726        | -479,9785  | 134,0249  |
|                                          |        | SPIKE5 | -323,62458* | 108,13983 | <b>,034</b> | -630,6263  | -16,6229  |
|                                          | SPIKE1 | CTR    | 172,88139   | 108,13983 | ,727        | -134,1203  | 479,8831  |
|                                          |        | IL6    | 172,97678   | 108,13983 | ,726        | -134,0249  | 479,9785  |
|                                          |        | SPIKE5 | -150,64780  | 108,13983 | 1,000       | -457,6495  | 156,3539  |
|                                          | SPIKE5 | CTR    | 323,52919*  | 108,13983 | <b>,034</b> | 16,5275    | 630,5309  |
|                                          |        | IL6    | 323,62458*  | 108,13983 | <b>,034</b> | 16,6229    | 630,6263  |
|                                          |        | SPIKE1 | 150,64780   | 108,13983 | 1,000       | -156,3539  | 457,6495  |
| IL6_5DAYS                                | CTR    | IL6    | -3,68067    | 279,37395 | 1,000       | -796,8045  | 789,4432  |
|                                          |        | SPIKE1 | -938,50588* | 279,37395 | <b>,014</b> | -1731,6297 | -145,3820 |
|                                          |        | SPIKE5 | -536,50671  | 279,37395 | ,390        | -1329,6306 | 256,6172  |
|                                          | IL6    | CTR    | 3,68067     | 279,37395 | 1,000       | -789,4432  | 796,8045  |
|                                          |        | SPIKE1 | -934,82521* | 279,37395 | <b>,014</b> | -1727,9491 | -141,7013 |
|                                          |        | SPIKE5 | -532,82604  | 279,37395 | ,401        | -1325,9499 | 260,2978  |
|                                          | SPIKE1 | CTR    | 938,50588*  | 279,37395 | <b>,014</b> | 145,3820   | 1731,6297 |
|                                          |        | IL6    | 934,82521*  | 279,37395 | <b>,014</b> | 141,7013   | 1727,9491 |
|                                          |        | SPIKE5 | 401,99917   | 279,37395 | ,968        | -391,1247  | 1195,1230 |
|                                          | SPIKE5 | CTR    | 536,50671   | 279,37395 | ,390        | -256,6172  | 1329,6306 |
|                                          |        | IL6    | 532,82604   | 279,37395 | ,401        | -260,2978  | 1325,9499 |
|                                          |        | SPIKE1 | -401,99917  | 279,37395 | ,968        | -1195,1230 | 391,1247  |
| Bonferroni's multiple comparison *p≤0.05 |        |        |             |           |             |            |           |



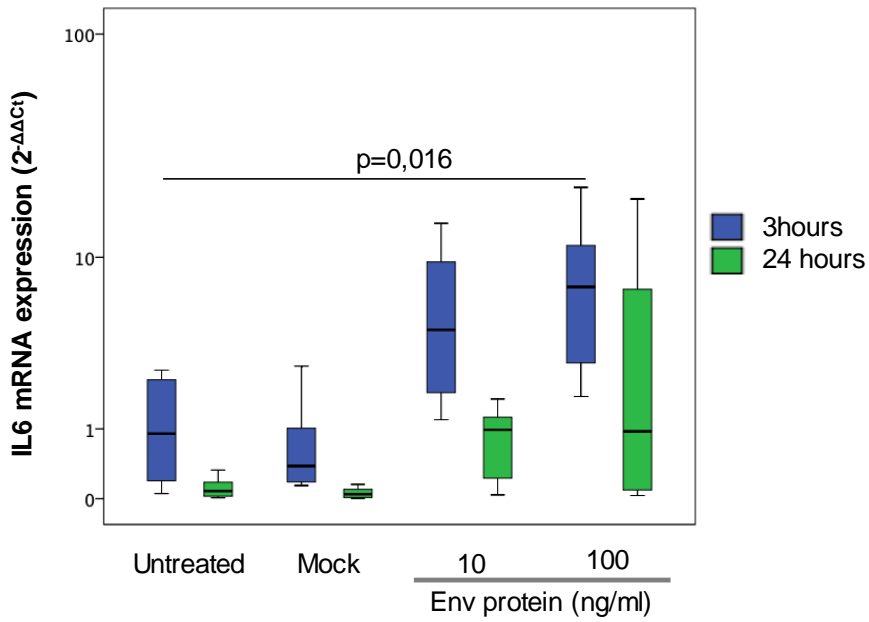

**Figure S4.** PBMCs from Healthy donors (n=4) stimulated with HERV W ENV protein (10 or 100 ng/ml) for 3, and 24 hours. Box plots of IL-6 mRNA levels, obtained by qRT-PCR analysis. ANOVA and Bonferroni's multiple comparison tests were performed \*p≤0.05

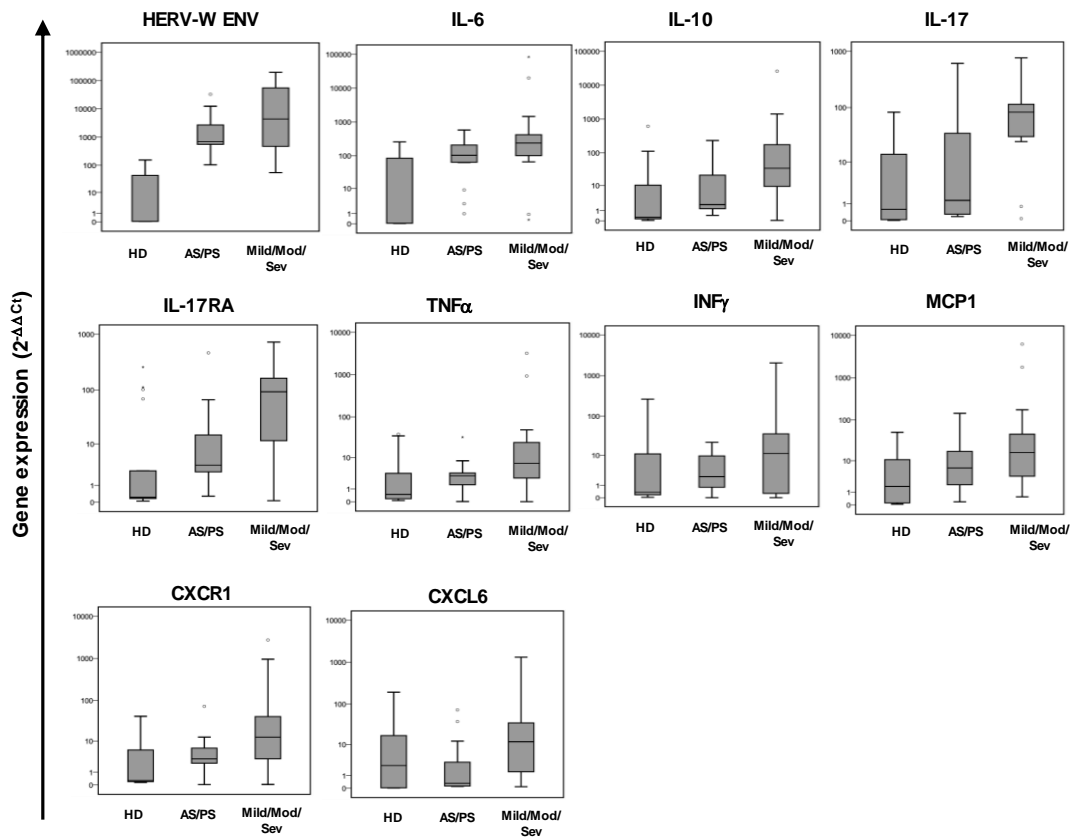

**Figure S5. HERV-W ENV and cytokines expression in leukocytes of COVID-19 patients according to clinical status.**

The COVID-19 patients were stratified based on clinical status as asymptomatic/pauci-symptomatic (AS+PS, n=15), mild, moderate and severe (Mild/Mod/Sev, n=15). The expression of HERV-W ENV, cytokines and related receptors were analysed in leukocytes, lymphocytes, monocytes, granulocytes, and T cell, B cell, and NK lymphocyte subtypes. Data are represented as box plots (white box: healthy donors, HD; grey box: all patients positive for SARS-CoV-2), the dashed lines separate the first two groups consisting of HD and SARS-CoV-2 positive asymptomatic patients that were hospitalized for comorbidities. Non-parametric Mann-Whitney test was used to compare groups and statistically significant values were considered when  $p < 0.050$  (Table S2).

**Table S4. Kruskal-Wallis test of HERV-W ENV, cytokines and receptors expression (mRNA) in blood samples of COVID19 and HD according to clinical status.**

|                                  | HERV-W ENV | IL-6   | IL-10 | IL-17  | IL-17RA | TNF $\alpha$ | INF $\gamma$ | MCP1  | CXCR1 | CXCL6 |
|----------------------------------|------------|--------|-------|--------|---------|--------------|--------------|-------|-------|-------|
| HD vs Asymp/Paucisympt           | <0.001*    | 0.030  | 0.327 | 0.567  | 0.246   | 0.082        | 0.447        | 0.401 | 0.683 | 0.083 |
| HD vs Mild/Mod/Sev               | <0.001     | <0.001 | 0.003 | <0.001 | 0.001   | 0.082        | 0.447        | 0.028 | 0.021 | 0.083 |
| Asymp/Paucisympt vs Mild/Mod/Sev | 1.000      | 0.740  | 0.304 | 0.076  | 0.265   | 0.082        | 0.447        | 0.860 | 0.440 | 0.083 |

\* Kruskal-Wallis Test

**Table S5. Median values, interquartile range and Kruskal-Wallis test of HERV-W ENV, cytokines and receptors expression (mRNA) in blood samples of COVID19 and HD according to clinical status.**

|  | HERV-W ENV | IL-6 | IL-10 | IL-17 | IL-17RA | TNF $\alpha$ | INF $\gamma$ | MCP1 | CXCR1 | CXCL6 |
|--|------------|------|-------|-------|---------|--------------|--------------|------|-------|-------|
|--|------------|------|-------|-------|---------|--------------|--------------|------|-------|-------|

|                                                  |           |           |         |         |         |         |        |        |        |        |        |
|--------------------------------------------------|-----------|-----------|---------|---------|---------|---------|--------|--------|--------|--------|--------|
| <b>Healthy donors number</b>                     | <b>17</b> |           |         |         |         |         |        |        |        |        |        |
| Median                                           |           | 0.045     | 0.040   | 0.269   | 0.594   | 0.225   | 0.490  | 0.354  | 1.717  | 0.274  | 2.474  |
| Interquartile Range (IQR)                        | 25        | 0.039     | 0.028   | 0.111   | 0.044   | 0.164   | 0.159  | 0.177  | 0.100  | 0.188  | 0.021  |
|                                                  | 50        | 0.045     | 0.040   | 0.269   | 0.594   | 0.225   | 0.490  | 0.354  | 1.717  | 0.274  | 2.474  |
|                                                  | 75        | 45.339    | 92.546  | 11.544  | 25.985  | 35.813  | 4.614  | 12.233 | 13.349 | 7.589  | 26.096 |
| <hr/>                                            |           |           |         |         |         |         |        |        |        |        |        |
| <b>Asymptomatic and</b>                          |           |           |         |         |         |         |        |        |        |        |        |
| <b>Paucisymptomatic patients number</b>          | <b>15</b> |           |         |         |         |         |        |        |        |        |        |
| Median                                           |           | 684.997   | 103.630 | 2.000   | 1,292   | 3.598   | 3.104  | 2.287  | 6.382  | 3.158  | 0.323  |
| Interquartile Range (IQR)                        | 25        | 498.451   | 63.360  | 1.255   | 0.260   | 2.342   | 1.396  | 0.744  | 1.198  | 2.221  | 0.115  |
|                                                  | 50        | 684.997   | 103.630 | 2.000   | 1.292   | 3.598   | 3.104  | 2.287  | 6.382  | 3.158  | 0.323  |
|                                                  | 75        | 9421.437  | 325.770 | 45.422  | 39.068  | 36.705  | 3.842  | 10.522 | 17.867 | 11.029 | 6.956  |
| <b>Mild, moderate and severe patients number</b> | <b>15</b> |           |         |         |         |         |        |        |        |        |        |
| Median                                           |           | 4376.194  | 240.628 | 34.432  | 82.683  | 92.885  | 7.019  | 11.163 | 16.268 | 12.542 | 11.773 |
| Interquartile Range (IQR)                        | 25        | 357.968   | 100.991 | 5.916   | 26.721  | 7.401   | 2.001  | 0.147  | 2.827  | 3.132  | 0.268  |
|                                                  | 50        | 4376.194  | 240.628 | 34.432  | 82.683  | 92.885  | 7.019  | 11.163 | 16.268 | 12.542 | 11.773 |
|                                                  | 75        | 56563.819 | 469.597 | 198.821 | 124.940 | 171.080 | 44.286 | 38.627 | 50.997 | 45.354 | 43.816 |

**Table S6 Median values and interquartile range of HERV-W ENV percentage in Lymphocytes according to Pulmonary involvement**

|                           |    | None+P | MiP   | BiP   | BiP+Bac |
|---------------------------|----|--------|-------|-------|---------|
| Median                    |    | 24,84  | 43,64 | 78,86 | 66,95   |
| Interquartile Range (IQR) | 25 | 8,31   | 35,43 | 44,00 | 60,93   |
|                           | 50 | 24,84  | 43,64 | 78,86 | 66,95   |
|                           | 75 | 47,43  | 61,41 | 90,37 |         |

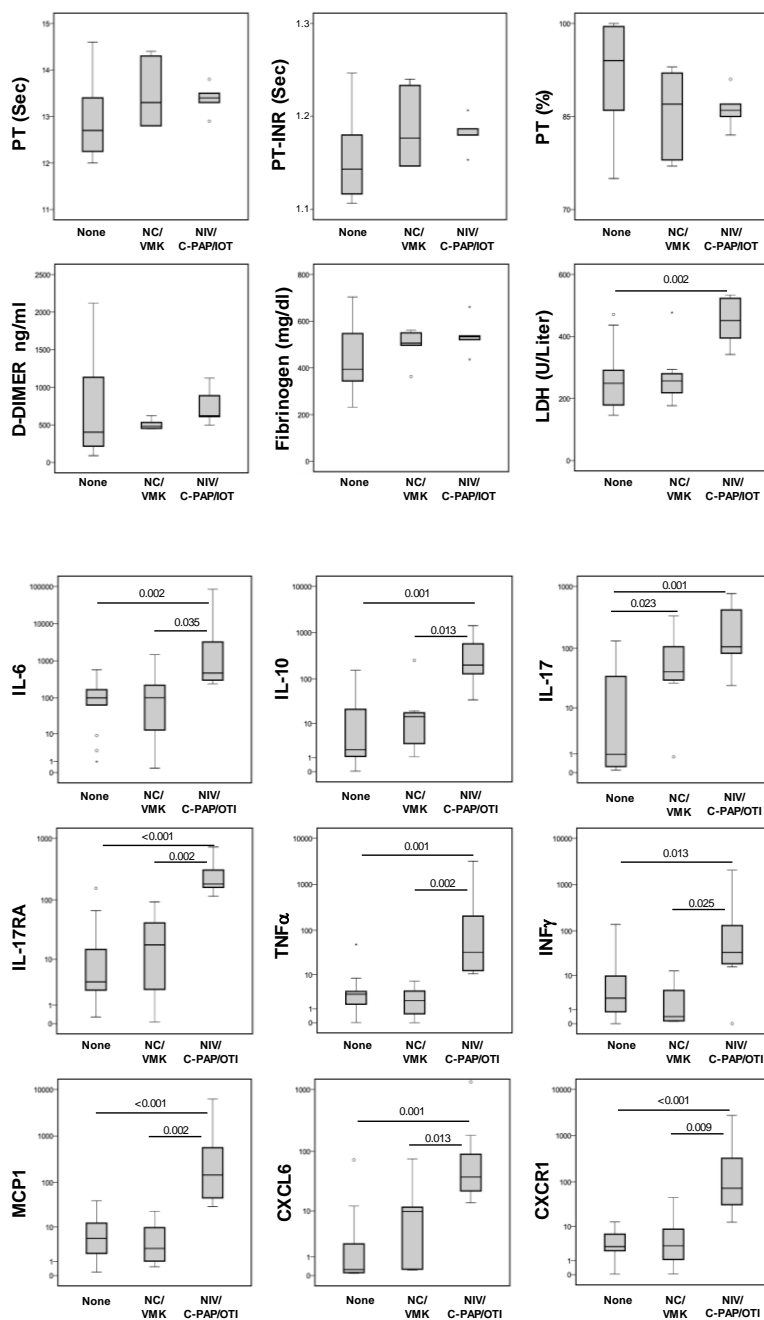

**None:** no oxygen support

**NC/VMK:** nasal Cannula/Venturi Mask

**NIV/C-PAP/OTI:** non invasive ventilation or orotracheal intubation

**Figure S6. Analysis of biochemical inflammatory markers and cytokine mRNA expression according to respiratory outcome.** The COVID-19 patients were stratified based on respiratory outcome during hospitalization as follows: no oxygen support needed (None; n=16), oxygen support with nasal cannula or ventimask (NC/VMK; n=8), oxygen support by non-invasive ventilation, continuous positive airway pressure or orotracheal intubation (NIV/C-PAP/OTI; n=6). The biochemical inflammatory marker levels and cytokine mRNA expression according to respiratory outcome are represented as box plots. Non-parametric Kruskal Wallis test with Bonferroni's correction was used to compare groups and statistically significant values were considered when  $p < 0.050$

**Table S7. Median values and interquartile range of HERV-W env transcriptional activity and cytokines and receptors expression (mRNA) in blood samples from COVID19, respect to respiratory outcome**

|                                                           |           | HERV-W<br>ENV | IL-6      | IL-10    | IL-17   | IL-17RA | TNF $\alpha$ | INF $\gamma$ | MCP1     | CXCR1   | CXCL6   |
|-----------------------------------------------------------|-----------|---------------|-----------|----------|---------|---------|--------------|--------------|----------|---------|---------|
| <b>No oxygen support</b>                                  | <b>16</b> |               |           |          |         |         |              |              |          |         |         |
| Median                                                    |           | 667.673       | 100.328   | 1.959    | 0.989   | 3.743   | 3.147        | 2.564        | 5,29531  | 3.018   | 0.251   |
| Interquartile Range (IQR)                                 | 25        | 527.741       | 63.748    | 1.077    | 0.244   | 2.415   | 1.456        | 0.775        | 1,66552  | 2.251   | 0.110   |
|                                                           | 50        | 667.673       | 100.328   | 1.959    | 0.989   | 3.743   | 3.147        | 2.564        | 5,29531  | 3.018   | 0.251   |
|                                                           | 75        | 2.407.388     | 191.030   | 36.465   | 36.883  | 28.956  | 3.801        | 10.097       | 14,8452  | 9.182   | 3.148   |
| <b>Nasal Cannula/Venturi Mask</b>                         | <b>7</b>  |               |           |          |         |         |              |              |          |         |         |
| Median                                                    |           | 690.906       | 101.616   | 14.404   | 41.207  | 17.827  | 2.006        | 0.416        | 2.826    | 3.206   | 9.804   |
| Interquartile Range (IQR)                                 | 25        | 102.260       | 0.882     | 1.344    | 26.721  | 0.529   | 0.038        | 0.146        | 0.918    | 0.093   | 0.258   |
|                                                           | 50        | 690.906       | 101.616   | 14.404   | 41.207  | 17.827  | 2.006        | 0.416        | 2.826    | 3.206   | 9.804   |
|                                                           | 75        | 6201.429      | 380.793   | 19.539   | 124.940 | 80.566  | 4.189        | 11.163       | 16.268   | 12.636  | 11.733  |
| <b>Non invasive ventilation or orotracheal intubation</b> | <b>7</b>  |               |           |          |         |         |              |              |          |         |         |
| Median                                                    |           | 56563.819     | 469.597   | 198.821  | 105.356 | 181.462 | 32.423       | 33.618       | 143.850  | 72.372  | 37.714  |
| Interquartile Range (IQR)                                 | 25        | 32713.820     | 249.303   | 124.257  | 82.683  | 149.817 | 12.111       | 15.729       | 40.844   | 26.783  | 17.521  |
|                                                           | 50        | 56563.819     | 469.597   | 198.821  | 105.356 | 181.462 | 32.423       | 33.618       | 143.850  | 72.372  | 37.714  |
|                                                           | 75        | 154766.801    | 20053.152 | 1420.835 | 610.367 | 464.042 | 928.520      | 433.114      | 1767.423 | 955.226 | 180.598 |

**Table S8. Median values and interquartile range of biochemical markers in blood samples from COVID19, respect to respiratory outcome**

|                                                           |           | PT<br>(Sec) | PT - INR<br>(Sec) | PT<br>(%) | D-DIMER<br>(ng/ml) | Fibrinogen<br>(mg/dl) | LDH<br>(U/liter) |
|-----------------------------------------------------------|-----------|-------------|-------------------|-----------|--------------------|-----------------------|------------------|
| <b>No oxygen support</b>                                  | <b>12</b> |             |                   |           |                    |                       |                  |
| Median                                                    |           | 12.700      | 1.065             | 94        | 402.5              | 394                   | 249              |
| Interquartile Range (IQR)                                 | 25        | 12.225      | 1.022             | 86        | 210.5              | 330                   | 173.5            |
|                                                           | 50        | 12.700      | 1.065             | 94        | 402.5              | 394                   | 249              |
|                                                           | 75        | 13.400      | 1.120             | 99.750    | 1192.25            | 588                   | 309              |
| <b>Nasal Cannula/Venturi Mask</b>                         | <b>6</b>  |             |                   |           |                    |                       |                  |
| Median                                                    |           | 13.300      | 1.115             | 87        | 481                | 506                   | 257              |
| Interquartile Range (IQR)                                 | 25        | 12.800      | 1.070             | 77.750    | 452.5              | 463.5                 | 207              |
|                                                           | 50        | 13.300      | 1.115             | 87        | 481                | 506                   | 257              |
|                                                           | 75        | 14.325      | 1.202             | 92.250    | 554.5              | 552.75                | 294              |
| <b>Non invasive ventilation or orotracheal intubation</b> | <b>5</b>  |             |                   |           |                    |                       |                  |

|                           |    |        |       |      |       |       |        |
|---------------------------|----|--------|-------|------|-------|-------|--------|
| Median                    |    | 13.400 | 1.120 | 86   | 622   | 533   | 451.5  |
| Interquartile Range (IQR) | 25 | 13.100 | 1.100 | 83.5 | 552.5 | 478.5 | 381.75 |
|                           | 50 | 13.400 | 1.120 | 86   | 622   | 533   | 451.5  |
|                           | 75 | 13.650 | 1.145 | 89   | 1005  | 599   | 525.75 |

**Table S9. Median values and interquartile range of the percentage of leucocytes and different subpopulations of leucocytes in blood samples from COVID19, respect to respiratory outcome**

|                                                           |    | Leukocytes | Lymphocytes | Monocytes | Granulocytes | CD3    | CD4    | CD8   | CD19   | CD56   | CD14    |
|-----------------------------------------------------------|----|------------|-------------|-----------|--------------|--------|--------|-------|--------|--------|---------|
| <b>No oxygen support</b>                                  |    | <b>16</b>  |             |           |              |        |        |       |        |        |         |
| Median                                                    |    | 8.430      | 42.485      | 34.825    | 2.145        | 47.040 | 8.565  | 15,1  | 2,155  | 4,225  | 6,53    |
| Interquartile Range (IQR)                                 | 25 | 1.540      | 21.63       | 8.387     | 1.102        | 24.435 | 5.230  | 5,835 | 1,0025 | 2,0225 | 1,675   |
|                                                           | 50 | 8.430      | 42.485      | 34.825    | 2.145        | 47.040 | 8.565  | 15,1  | 2,155  | 4,225  | 6,53    |
|                                                           | 75 | 49         | 61.537      | 58.582    | 12.652       | 59.857 | 21.802 | 22,37 | 33,66  | 9,285  | 20,3975 |
| <b>Nasal Cannula/Venturi Mask</b>                         |    | <b>7</b>   |             |           |              |        |        |       |        |        |         |
| Median                                                    |    | 55         | 66.950      | 60.050    | 51.100       | 61.670 | 25.090 | 5,05  | 3,33   | 11,77  | 4,46    |
| Interquartile Range (IQR)                                 | 25 | 16.400     | 32.580      | 23.250    | 11.860       | 46.500 | 11.700 | 2,25  | 1,96   | 10,86  | 1,09    |
|                                                           | 50 | 55         | 66.950      | 60.050    | 51.100       | 61.670 | 25.090 | 5,05  | 3,33   | 11,77  | 4,46    |
|                                                           | 75 | 71.220     | 90.070      | 89.700    | 91.170       | 88.670 | 39.310 | 10,82 | 10,62  | 89,38  | 10,2    |
| <b>Non invasive ventilation or orotracheal intubation</b> |    | <b>7</b>   |             |           |              |        |        |       |        |        |         |
| Median                                                    |    | 9.930      | 78.860      | 5.290     | 3.360        | 28.900 | 56.800 | 25,31 | 17,33  | 4,2    | 3,85    |
| Interquartile Range (IQR)                                 | 25 | 4.710      | 45.540      | 2.100     | 0.120        | 15.690 | 35.760 | 1,91  | 1,04   | 1,73   | 1       |
|                                                           | 50 | 9.930      | 78.860      | 5.29      | 3.360        | 28.900 | 56.800 | 25,31 | 17,33  | 4,2    | 3,85    |
|                                                           | 75 | 40.900     | 90.370      | 23.550    | 5.170        | 92.860 | 76.670 | 57,45 | 96,88  | 14,02  | 42,63   |
